# Supplementary material for: Involvement of ammonia metabolism in the improvement of endurance performance by tea catechins in mice
Source: PubMed Central journal article supplement (PMC7142105; doi:10.1038/s41598-020-63139-9), 2020-04-08
Supplement: 41598_2020_63139_MOESM1_ESM.pdf [file 41598_2020_63139_MOESM1_ESM.pdf]

**TITLE PAGE**

**Involvement of ammonia metabolism in the improvement of endurance performance by  
tea catechins in mice**

Shu Chen, Yoshihiko Minegishi, Takahiro Hasumura, Akira Shimotoyodome and Noriyasu

Ota

| Ingredient      | Control (%) | 0.5% GTCs (%) |
|-----------------|-------------|---------------|
| Potato starch   | 55.5        | 55.0          |
| Corn oil        | 10.0        | 10.0          |
| Casein          | 20.0        | 20.0          |
| Cellulose       | 8.1         | 8.1           |
| Mineral mixture | 4.0         | 4.0           |
| Vitamin mixture | 2.2         | 2.2           |
| Methionine      | 0.2         | 0.2           |
| GTCs            | 0.0         | 0.5           |

**Supplementary Table S1.** Compositions of the experimental diets.  
GTCs, green tea catechins.

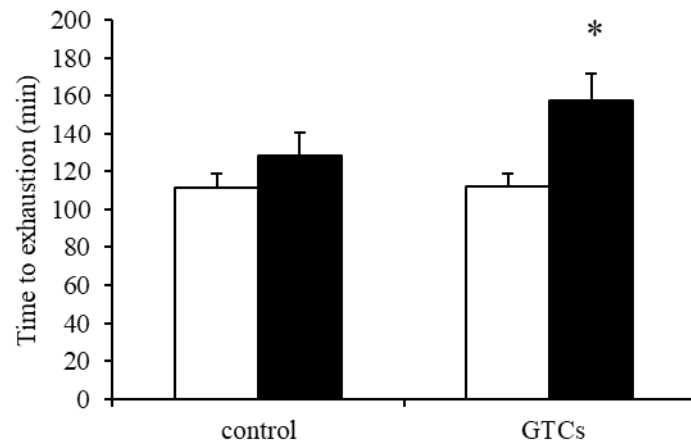

**Supplementary Figure S1.** Effect of the intake of green tea catechins (GTC) on exercise endurance performance in mice. After 8 weeks of exercise training, running time to exhaustion was measured to evaluate endurance performance. Open bars = pre-exercise training; closed bars = post-exercise training. Data are presented as mean  $\pm$  s.e.m.;  $n = 8$ . \*  $P < 0.05$  (Mann–Whitney U test).
